# Supplementary material for: Association between Aortic Calcification Burden and the Severity of Erectile Dysfunction in Men Undergoing Dialysis: A Cross-Sectional Study
Source: PubMed Central journal article supplement — World J Mens Health. 2022 May 25;41(2):373–81. doi: 10.5534/wjmh.210230 (PMC10042658; doi:10.5534/wjmh.210230), 2022-05-25
Supplement: wjmh-41-373-s001.pdf [file wjmh-41-373-s001.pdf]

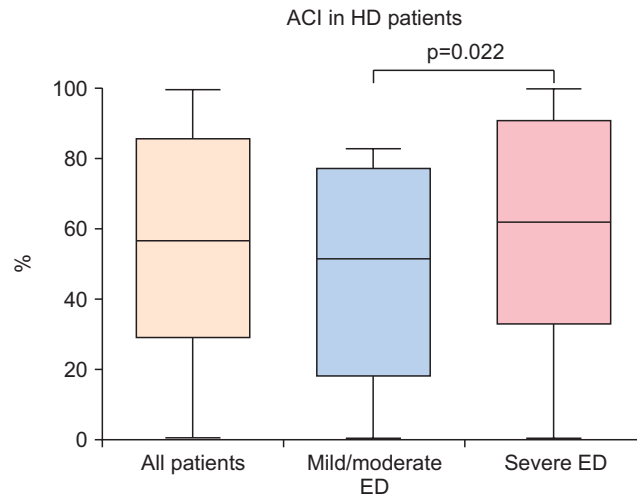

**Supplement Fig. 1.** Association between aortic calcification index (ACI) and the Sexual Health Inventory for Men (SHIM) score in patients undergoing hemodialysis (HD). ACI was compared between the mild/moderate and severe erectile dysfunction (ED) groups using the Mann–Whitney U-test in patients undergoing HD.
