# Supplementary material for: Association between Aortic Calcification Burden and the Severity of Erectile Dysfunction in Men Undergoing Dialysis: A Cross-Sectional Study
Source: PubMed Central journal article supplement — World J Mens Health. 2022 May 25;41(2):373–81. doi: 10.5534/wjmh.210230 (PMC10042658; doi:10.5534/wjmh.210230), 2022-05-25
Supplement: wjmh-41-373-s002.pdf [file wjmh-41-373-s002.pdf]

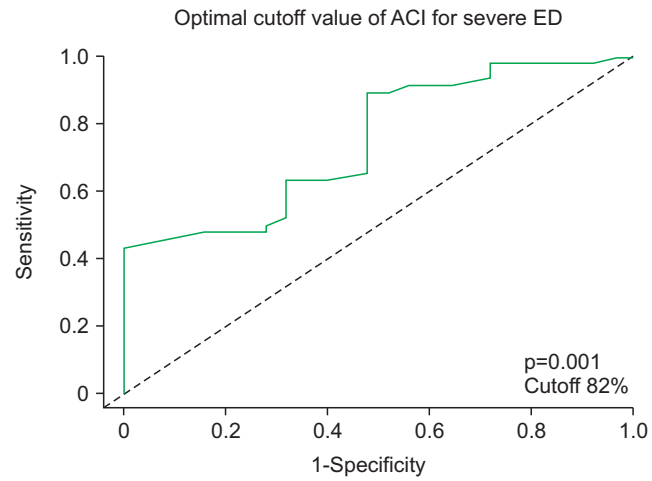

**Supplement Fig. 2.** Optimal cutoff values of aortic calcification index (ACI) for severe erectile dysfunction (ED). The optimal cutoff value of ACI was calculated using the receiver operating characteristic curve.
