# Supplementary material for: Association between Aortic Calcification Burden and the Severity of Erectile Dysfunction in Men Undergoing Dialysis: A Cross-Sectional Study
Source: PubMed Central journal article supplement — World J Mens Health. 2022 May 25;41(2):373–81. doi: 10.5534/wjmh.210230 (PMC10042658; doi:10.5534/wjmh.210230), 2022-05-25
Supplement: wjmh-41-373-s003.pdf [file wjmh-41-373-s003.pdf]

**Supplement Table 1.** Univariable analyses for severe erectile dysfunction in patients undergoing hemodialysis

| Variable                    | Factor     | p-value | Odds ratio | 95% confidence interval |
|-----------------------------|------------|---------|------------|-------------------------|
| Age                         | Continuous | 0.095   | 1.054      | 0.991–1.120             |
| Body mass index             | Continuous | 0.721   | 0.983      | 0.894–1.081             |
| Hypertension                | Positive   | 0.516   | 0.472      | 0.049–4.546             |
| Dyslipidemia                | Positive   | 0.843   | 0.888      | 0.274–2.879             |
| Diabetes mellitus           | Positive   | 0.703   | 0.802      | 0.258–2.490             |
| Duration of dialysis        | Continuous | 0.098   | 1.010      | 0.998–1.023             |
| β-blockers                  | Taking     | 0.706   | 0.808      | 0.267–2.445             |
| Calcium-blockers            | Taking     | 0.691   | 0.791      | 0.249–2.514             |
| Serum iPTH level            | Continuous | 0.221   | 0.997      | 0.992–1.002             |
| Serum testosterone level    | Continuous | 0.826   | 1.000      | 0.996–1.003             |
| Smoking status              | Current    | 0.636   | 1.422      | 0.331–6.118             |
| Depression                  | Positive   | >0.999  | 1.000      | 0.085–11.78             |
| Cardio-ankle vascular index | Continuous | 0.652   | 1.073      | 0.791–1.455             |
| Ankle-brachial index        | Continuous | 0.098   | 0.068      | 0.003–1.641             |
| Aortic calcification index  | Continuous | 0.050   | 1.019      | 1.000–1.039             |

iPTH: intact parathyroid hormone.
